# Supplementary material for: Insurance, Endometriosis and the use of medicinal cannabis in Australia: A qualitative analysis
Source: Research Square preprint supplement (doi:10.21203/rs.3.rs-6083910/v1), 2025-08-27
Supplement: Supplementary file 1 [file 3614e466d160f8691fee56f3.pdf]

## **Focus Group 2 Questions – Advisers and Insurers**

### **A study of endometriosis patient experiences with life, disability, trauma and private health insurances.**

- 1) What are the biggest challenges you have in your role when it comes to clients with endometriosis?
- 2) What are your thoughts on endometriosis as a condition being covered under more trauma contracts across the sector? Good thing / bad thing/ why?
- 3) When it comes to your role, how do we feel this cohort of people are being treated relative to other populations with chronic diseases?
- 4) Can you describe your organisations approach to cannabis when it comes to insurance medicine risks and whether it be in pre-assessments, underwriting, claims – how it comes up; how it is assessed / viewed (positive or negative etc)?
- 5) Do you feel underwriting and claims management guidelines are up to scratch when it comes to cannabis based medicinal products?
- 6) What would your reaction be if you found out endometriosis patients were needing to access their superannuation / retirement fund to fund medical care like surgery?
- 7) Tell me about any training you have had on the role of the endocannabinoid system or cannabis use in medical or insurance medicine settings?
